# Supplementary material for: Assessment of intra- and inter-genetic diversity in tetraploid and hexaploid wheat genotypes based on omega, gamma and alpha-gliadin profiles
Source: PeerJ journal article supplement (doi:10.7717/peerj.16330), 2023-11-07
Supplement: FigureS1.pdf [file FigureS1.pdf]

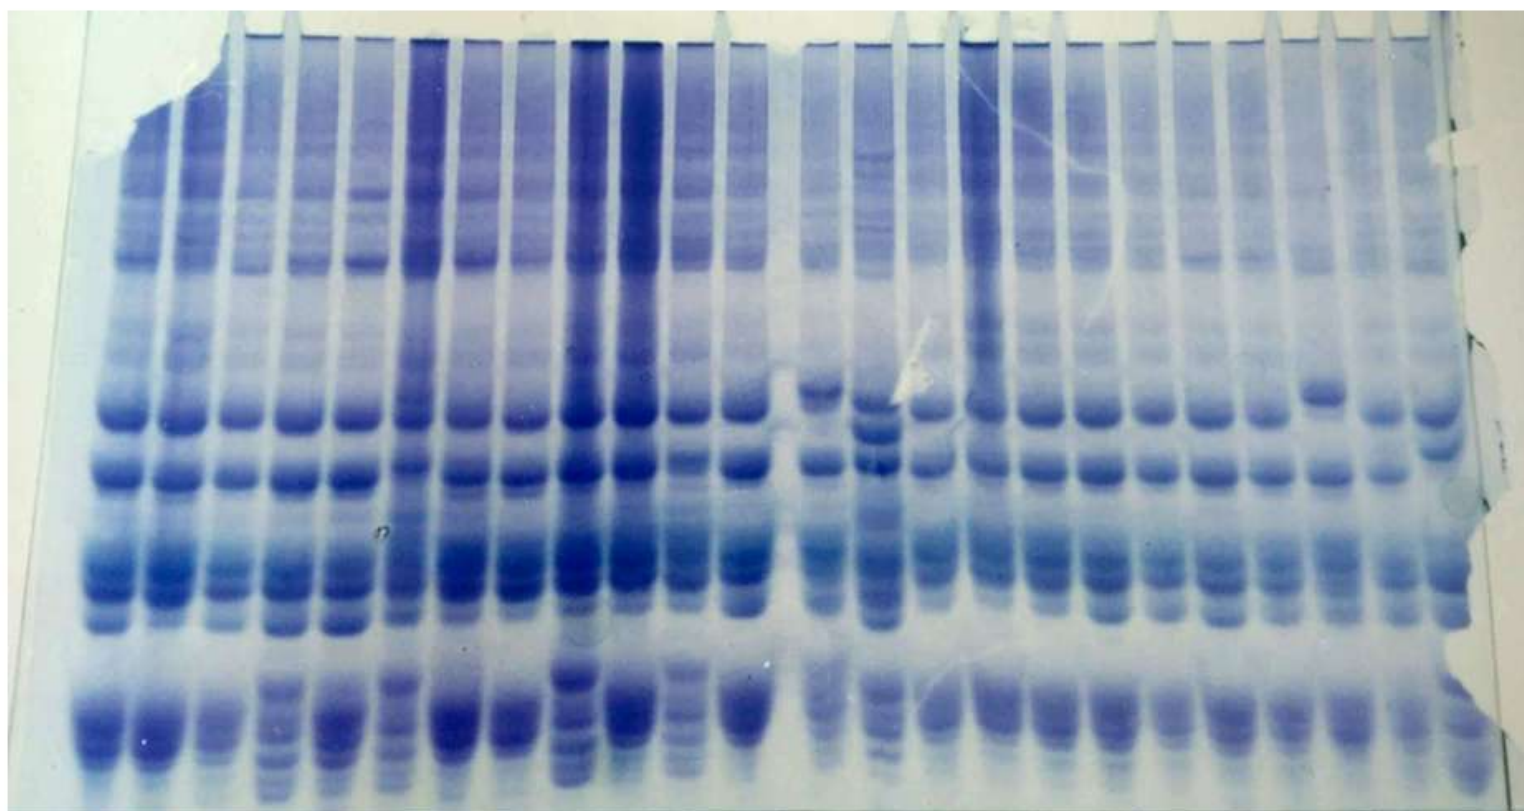

**Glutenine and gliadin banding patterns of 23 durum genotypes**
