# Supplementary material for: Assessment of intra- and inter-genetic diversity in tetraploid and hexaploid wheat genotypes based on omega, gamma and alpha-gliadin profiles
Source: PeerJ. 2023 Nov 7;11:e16330. doi: 10.7717/peerj.16330 (PMC10637246; doi:10.7717/peerj.16330)
Supplement: Supplemental Information 5 [file peerj-11-16330-s005.xlsx]

## Sheet: Sheet2
	Amino acid	Triticum turgidum			Triticum aestivum
		Omega gliadin	Gamma gliadin	Alpha gliadin	Omega gliadin	Gamma gliadin	Alpha gliadin
	Ala (A)	1.9	2.5	4.8	1.5	2.2	4.5
	Arg (R)	1.1	2.2	1.4	1.5	2.2	2.1
	Asn (N)	0.6	1.5	2.4	0.3	1.5	2.1
	Asp (D)	0	0.7	0.3	0.6	0.7	0.3
	Cys (C)	0	2.9	2	0	2.9	1.7
	Gln (Q)	37.6	31.6	36.1	47.9	32.8	33.2
	Glu (E)	1.7	1.1	1.4	2.1	1.1	1.4
	Gly (G)	0.8	2.9	2	0.6	2.9	2.1
	His (H)	0.8	1.5	1.4	1.2	1.5	1.4
	Ile (I)	3.1	6.2	5.1	4.6	6.6	5.5
	Leu (L)	5.3	7.3	7.1	3.4	6.6	8.2
	Lys (K)	0.8	1.1	0.7	0.9	1.1	0.3
	Met (M)	0.8	1.5	0.7	0.9	2.2	1
	Phe (F)	8.6	4.7	3.7	10.1	5.1	3.8
	Pro (P)	26.7	16	14.3	18.6	15	15.4
	Ser (S)	5.6	6.5	5.4	3.4	6.9	6.2
	Thr (T)	2.5	1.8	3.1	0.9	1.8	2.4
	Trp (W)	0.3	0.7	0.3	0	0.7	0.3
	Tyr (Y)	1.1	1.5	2.7	0.9	0.7	3.8
	Val (V)	0.6	5.8	5.1	0.6	5.5	4.5
